# Supplementary material for: Short-Term SGLT2 Inhibitor Administration Does Not Alter Systemic Insulin Clearance in Type 2 Diabetes
Source: MDPI journal article supplement (doi:10.3390/biomedicines9091154), 2021-09-03
Supplement: s1 [file s1]

**Supplementary Table S1. Changes in each parameter from 0 to 180 minutes**

|                                        | Baseline study | Acute effect study | <i>P</i>        |
|----------------------------------------|----------------|--------------------|-----------------|
| Glucose (mg/dL)                        | -14.6 ± 13.3   | -26.4 ± 14.6       | <b>.002</b>     |
| Insulin (μU/mL)                        | -0.4 ± 1.8     | -1.8 ± 1.6         | <b>.019</b>     |
| C-peptide (ng/mL)                      | -0.1 ± 0.2     | -0.3 ± 0.2         | <b>.001</b>     |
| Glucagon (pg/mL)                       | 5.1 ± 4.5      | 11.1 ± 6.6         | <b>.015</b>     |
| NEFA (μEq/L)                           | 86.0 ± 74.9    | 198.5 ± 149.5      | <b>.017</b>     |
| EGP (mg/kg·min <sup>-1</sup> )         | -0.22 ± 0.12   | 0.08 ± 0.20        | <b>&lt;.001</b> |
| Urinary glucose excretion (mg/3 hours) | 51.8 ± 112.3   | 7845.7 ± 2720.2    | <b>&lt;.001</b> |

Data are expressed as means ± SD or medians (interquartile range).

NEFA, non-esterified fatty acids; EGP, endogenous glucose production.
